# Supplementary material for: Associations of smoking and alcohol consumption with healthy ageing: a systematic review and meta-analysis of longitudinal studies
Source: PubMed Central journal article supplement (PMC5905752; doi:10.1136/bmjopen-2017-019540), 2018-04-17
Supplement: bmjopen-2017-019540supp005.pdf [file bmjopen-2017-019540supp005.pdf]

**Table A2:** Quality assessment of the studies – aggregated results of QUIPS tool

| Author, Year of Publication | The study sample represents the population of interest on key characteristics, sufficient to limit potential bias of the observed relationship between PF and outcome. | Loss to follow-up is not associated with key characteristics sufficient to limit potential bias to the observed relationship between PF and outcome. | PF is adequately measured in study participants to sufficiently limit potential bias. | Outcome of interest is adequately measured in study participants to sufficiently limit potential bias. | Important potential confounders are appropriately accounted for, limiting potential bias with respect to the relationship between PF and outcome. | The statistical analysis is appropriate for the design of the study, limiting potential for presentation of invalid or spurious results. | Total         |
|-----------------------------|------------------------------------------------------------------------------------------------------------------------------------------------------------------------|------------------------------------------------------------------------------------------------------------------------------------------------------|---------------------------------------------------------------------------------------|--------------------------------------------------------------------------------------------------------|---------------------------------------------------------------------------------------------------------------------------------------------------|------------------------------------------------------------------------------------------------------------------------------------------|---------------|
| Andrews et al., 2002        | Low Bias                                                                                                                                                               | Moderate Bias                                                                                                                                        | Moderate Bias                                                                         | Low Bias                                                                                               | Moderate Bias                                                                                                                                     | Low Bias                                                                                                                                 | Moderate Bias |
| Bell et al., 2014           | Low Bias                                                                                                                                                               | Low Bias                                                                                                                                             | Low Bias                                                                              | Low Bias                                                                                               | Moderate Bias                                                                                                                                     | Low Bias                                                                                                                                 | Low Bias      |
| Britton et al., 2008        | Low Bias                                                                                                                                                               | Moderate Bias                                                                                                                                        | Low Bias                                                                              | Low Bias                                                                                               | Moderate Bias                                                                                                                                     | Low Bias                                                                                                                                 | Low Bias      |
| Burke et al., 2001          | Low Bias                                                                                                                                                               | Low Bias                                                                                                                                             | Low Bias                                                                              | Moderate Bias                                                                                          | Moderate Bias                                                                                                                                     | Low Bias                                                                                                                                 | Low Bias      |
| Ford et al., 2000           | Low Bias                                                                                                                                                               | Moderate Bias                                                                                                                                        | Moderate Bias                                                                         | Moderate Bias                                                                                          | Low Bias                                                                                                                                          | Low Bias                                                                                                                                 | Moderate Bias |
| Gu et al., 2009             | Low Bias                                                                                                                                                               | Low Bias                                                                                                                                             | Low Bias                                                                              | Low Bias                                                                                               | Moderate Bias                                                                                                                                     | Low Bias                                                                                                                                 | Low Bias      |
| Guralnik & Kaplan, 1989     | Low Bias                                                                                                                                                               | Moderate Bias                                                                                                                                        | Moderate Bias                                                                         | Moderate Bias                                                                                          | Moderate Bias                                                                                                                                     | Low Bias                                                                                                                                 | Moderate Bias |
| Gureje et al., 2014         | Low Bias                                                                                                                                                               | Moderate Bias                                                                                                                                        | Low Bias                                                                              | Low Bias                                                                                               | Moderate Bias                                                                                                                                     | Low Bias                                                                                                                                 | Low Bias      |
| Hamer et al., 2013          | Low Bias                                                                                                                                                               | Low Bias                                                                                                                                             | Moderate Bias                                                                         | Low Bias                                                                                               | Low Bias                                                                                                                                          | Low Bias                                                                                                                                 | Low Bias      |
| Hodge, English et al., 2013 | Low Bias                                                                                                                                                               | Moderate Bias                                                                                                                                        | Low Bias                                                                              | Low Bias                                                                                               | Low Bias                                                                                                                                          | Low Bias                                                                                                                                 | Low Bias      |
| Hodge, O’Dea et al., 2014   | Low Bias                                                                                                                                                               | High Bias                                                                                                                                            | Low Bias                                                                              | Low Bias                                                                                               | Low Bias                                                                                                                                          | Low Bias                                                                                                                                 | Moderate Bias |
| Kaplan et al., 2008         | Low Bias                                                                                                                                                               | Moderate Bias                                                                                                                                        | Low Bias                                                                              | Moderate Bias                                                                                          | Low Bias                                                                                                                                          | Low Bias                                                                                                                                 | Low Bias      |
| LaCroix et al., 2016        | Low Bias                                                                                                                                                               | Moderate Bias                                                                                                                                        | Low Bias                                                                              | Low Bias                                                                                               | Moderate Bias                                                                                                                                     | Low Bias                                                                                                                                 | Low Bias      |
| Li et al., 2001             | Low Bias                                                                                                                                                               | High Bias                                                                                                                                            | Low Bias                                                                              | Low Bias                                                                                               | Moderate Bias                                                                                                                                     | Low Bias                                                                                                                                 | Moderate Bias |
| Liu & Su, 2016              | Low Bias                                                                                                                                                               | Moderate Bias                                                                                                                                        | Low Bias                                                                              | Low Bias                                                                                               | Moderate Bias                                                                                                                                     | Low Bias                                                                                                                                 | Low Bias      |
| Newman et al., 2003         | Low Bias                                                                                                                                                               | Low Bias                                                                                                                                             | Low Bias                                                                              | Low Bias                                                                                               | Moderate Bias                                                                                                                                     | Low Bias                                                                                                                                 | Low Bias      |
| Newson et al.,              | Low Bias                                                                                                                                                               | Moderate Bias                                                                                                                                        | Low Bias                                                                              | Low Bias                                                                                               | Moderate Bias                                                                                                                                     | Low Bias                                                                                                                                 | Low Bias      |

2010

|                                  |               |               |               |               |               |               |               |
|----------------------------------|---------------|---------------|---------------|---------------|---------------|---------------|---------------|
| Pruchno & Wilson-Genderson, 2015 | Low Bias      | Moderate Bias | Low Bias      | Low Bias      | Moderate Bias | Low Bias      | Low Bias      |
| Reed et al., 2011                | Low Bias      | Moderate Bias | Low Bias      | Low Bias      | Low Bias      | Moderate Bias | Low Bias      |
| Sabia et al., 2012               | Low Bias      | Low Bias      | Low Bias      | Moderate Bias | Low Bias      | Low Bias      | Low Bias      |
| Sarnak et al., 2008              | Low Bias      | Moderate Bias | Moderate Bias | Low Bias      | Moderate Bias | Low Bias      | Moderate Bias |
| Shields & Martel, 2006           | Low Bias      | Moderate Bias | Low Bias      | Low Bias      | Low Bias      | Low Bias      | Low Bias      |
| Sun et al., 2011                 | Low Bias      | Low Bias      | Low Bias      | Low Bias      | Low Bias      | Low Bias      | Low Bias      |
| Tampubolon, 2016                 | Low Bias      | Low Bias      | Low Bias      | Low Bias      | Moderate Bias | Low Bias      | Low Bias      |
| Terry et al., 2005               | Low Bias      | Low Bias      | Low Bias      | Moderate Bias | Moderate Bias | Moderate Bias | Moderate Bias |
| Vaillant & Mukamal, 2001         | High Bias     | Moderate Bias | Low Bias      | Moderate Bias | Moderate Bias | Low Bias      | High Bias     |
| Vaillant & Western, 2001         | High Bias     | Low Bias      | Low Bias      | Low Bias      | Moderate Bias | Low Bias      | Moderate Bias |
| Willcox et al., 2006             | Moderate Bias | Moderate Bias | Low Bias      | Low Bias      | Moderate Bias | Low Bias      | Moderate Bias |
