# Supplementary material for: Associations of smoking and alcohol consumption with healthy ageing: a systematic review and meta-analysis of longitudinal studies
Source: PubMed Central journal article supplement (PMC5905752; doi:10.1136/bmjopen-2017-019540), 2018-04-17

Figure A2: Smoking and healthy ageing-follow-up time stratified

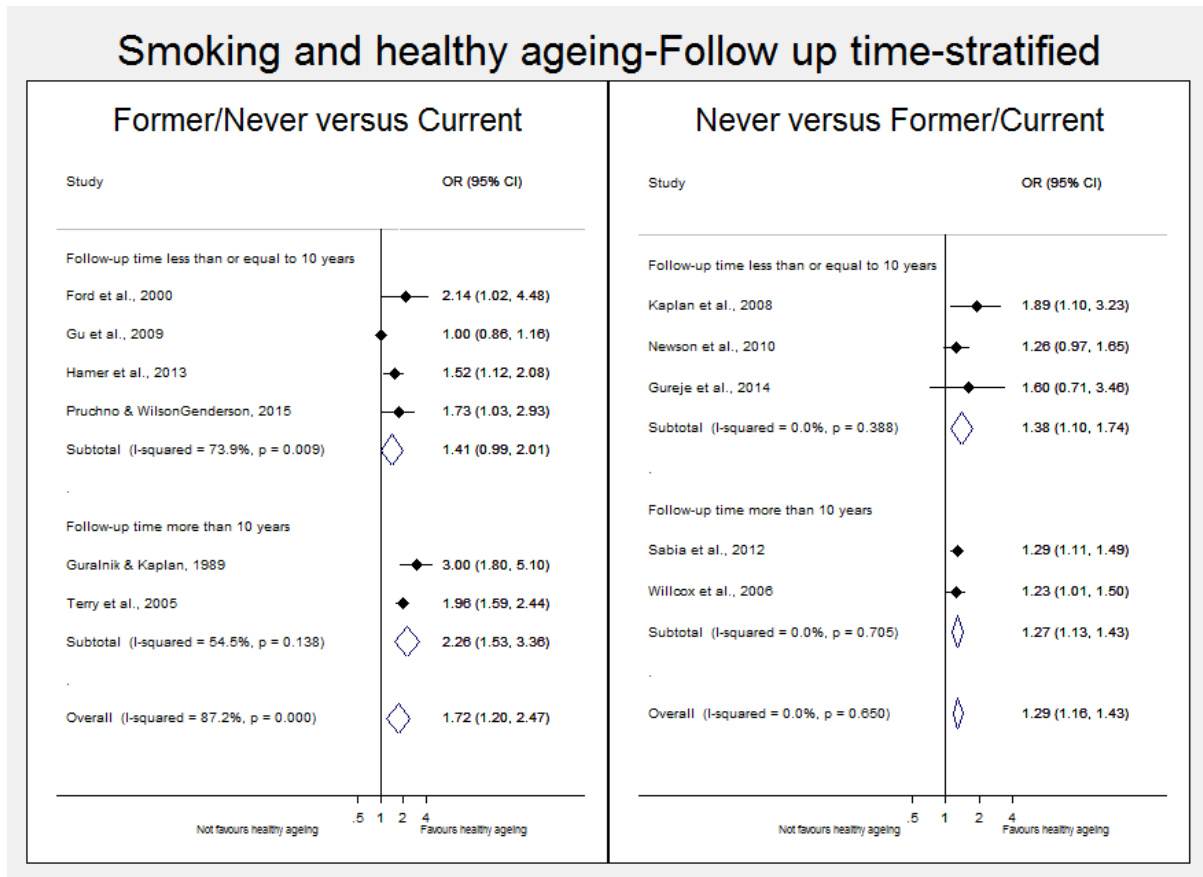

Supplement: bmjopen-2017-019540supp007.pdf [file bmjopen-2017-019540supp007.pdf]
