# Supplementary material for: Associations of smoking and alcohol consumption with healthy ageing: a systematic review and meta-analysis of longitudinal studies
Source: PubMed Central journal article supplement (PMC5905752; doi:10.1136/bmjopen-2017-019540), 2018-04-17
Supplement: bmjopen-2017-019540supp009.pdf [file bmjopen-2017-019540supp009.pdf]

**Table A3:** Sensitivity analysis of meta-analytic results

| Analysis                 | Number of Studies | DerSimonian-Laird<br>ORs and 95%CI | p-value | I <sup>2</sup> | Paule-Mandel<br>ORs and 95%CI | p-value | I <sup>2</sup> |
|--------------------------|-------------------|------------------------------------|---------|----------------|-------------------------------|---------|----------------|
| Never vs Current Smokers | 7*                | 2.36 (2.03-2.75)                   | <.001   | 43.3%          | 2.29 (2.03-2.59)              | <.001   | 23.6%          |
| Never vs Former Smokers  | 5†                | 1.32 (1.23-1.41)                   | <.001   | 32.8%          | 1.31 (1.21-1.43)              | <.001   | 50.0%          |
| Past/Never vs Current    | 6‡                | 1.72 (1.20-2.47)                   | .003    | 87.2%          | 1.69 (1.25-2.29)              | <.001   | 81.3%          |
| Never vs Past/Current    | 5§                | 1.29 (1.16-1.43)                   | <.001   | 0.0%           | 1.29 (1.16-1.43)              | <.001   | 0.0%           |
| Drinkers vs Non-Drinkers | 5                 | 1.28 (1.08-1.52)                   | .004    | 72.1%          | 1.29 (1.10-1.50)              | .002    | 68.2%          |
| Light vs Non-Drinkers    | 3¶                | 1.12 (1.03-1.22)                   | .010    | 0.0%           | 1.12 (1.03-1.22)              | .010    | 0.0%           |
| Moderate vs Non-Drinkers | 4**               | 1.35 (0.93-1.97)                   | .112    | 71.4%          | 1.37 (0.90-2.08)              | .138    | 77.0%          |
| High to Non-Drinkers     | 3††               | 1.25 (1.09-1.44)                   | .002    | 0.0%           | 1.25 (1.09-1.44)              | .002    | 0.0%           |

OR: Odds Ratio; CI: Confidence Interval

\* Bell et al., 2014; Britton et al., 2008 (Males); Britton et al., 2008 (Females); Hodge, English et al., 2013; Hodge, O’Dea et al., 2014; LaCroix et al., 2016 (veterans); LaCroix et al., 2016 (non-veterans)

† Bell et al., 2014; Hodge, English et al., 2013; Hodge, O’Dea et al., 2014; LaCroix et al., 2016 (veterans); LaCroix et al., 2016 (non-veterans)

‡ Ford et al., 2000; Gu et al., 2009; Guralnik & Kaplan, 1989; Hamer et al., 2013; Pruchno & Wilson-Genderson, 2015; Terry et al., 2005

§ Kaplan et al., 2008; Newson et al., 2010; Gureje et al., 2014; Sabia et al., 2012; Willcox et al., 2006

|| Ford et al., 2000; Gu et al, 2009; Gureje et al., 2014; LaCroix et al., 2016 (veterans); LaCroix et al., 2016 (non-veterans)

¶ Hodge, English et al., 2013; Hodge, O’Dea et al., 2014; Sun et al., 2011

\*\* Britton et al., 2008 (Males); Britton et al., 2008 (Females); Guralnik & Kaplan, 1989; Sun et al., 2011

†† Hodge, English et al., 2013; Hodge, O’Dea et al., 2014; Sun et al., 2011
